# Supplementary material
Source: PubMed Central journal article supplement (PMC3594000)

# Molecular Imaging of Neuroblastoma Progression in TH-MYCN Transgenic Mice

Journal: Molecular Imaging and Biology

Carmelo Quarta,<sup>1,6</sup> Erika Cantelli,<sup>2,6</sup> Cristina Nanni,<sup>1</sup> Valentina Ambrosini,<sup>1</sup> Daniela D'ambrosio,<sup>1,3</sup> Korinne Di Leo,<sup>2</sup> Silvia Angelucci,<sup>5</sup> Federico Zagni,<sup>1,3</sup> Filippo Lodi,<sup>1</sup> Mario Marengo,<sup>1,3</sup> William A. Weiss,<sup>4</sup> Andrea Pession,<sup>2</sup> Roberto Tonelli,<sup>5,6</sup> Stefano Fanti<sup>1,6</sup>

<sup>1</sup>Department of Nuclear Medicine, S.Orsola-Malpighi Hospital, University of Bologna, Italy,

<sup>2</sup>Pediatric Hematology-Oncology, University of Bologna, Italy, <sup>3</sup>Department of Medical Physics, S.Orsola-Malpighi Hospital, Bologna, Italy, <sup>4</sup>University of California San Francisco, CA, USA,

<sup>5</sup>Department of Pharmacology, University of Bologna, Italy.

<sup>6</sup>These authors contributed equally.

E-mail: [quartacarmelo@yahoo.it](mailto:quartacarmelo@yahoo.it).

## Supplementary figure 1

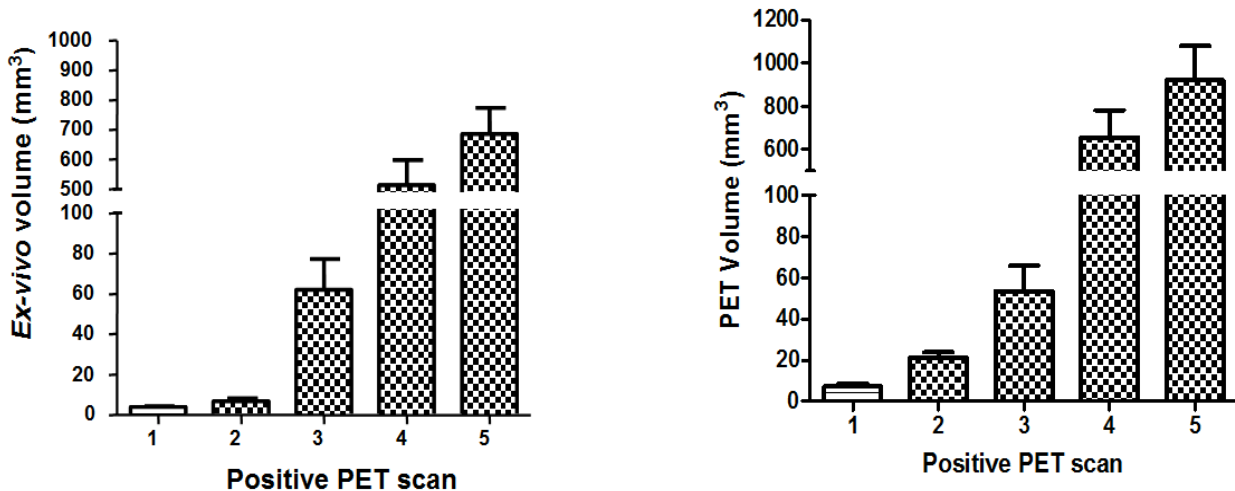

Supplement: NIHMS420769-supplement-Supplementary_data.pdf [file NIHMS420769-supplement-Supplementary_data.pdf]
